1 **ViralLink: An integrated workflow to investigate the effect**  
2 **of SARS-CoV-2 on intracellular signalling and regulatory**  
3 **pathways**

4 Agatha Treveil <sup>1,2</sup>, Balazs Bohar <sup>1,4</sup>, Padhmanand Sudhakar <sup>1,2,3</sup>, Lejla Gul<sup>1</sup>, Luca Csabai <sup>1,4</sup>,  
5 Marton Olbei <sup>1,2</sup>, Martina Poletti <sup>1,2</sup>, Matthew Madgwick <sup>1,2</sup>, Tahila Andrighetti <sup>1,5</sup>, Isabelle  
6 Hautefort <sup>1</sup>, Dezso Modos <sup>1,2</sup>, Tamas Korcsmaros <sup>1,2\*</sup>

7

8 <sup>1</sup> Earlham Institute, Norwich, UK

9 <sup>2</sup> Quadram Institute Bioscience, Norwich, UK

10 <sup>3</sup> KU Leuven Department of Chronic Diseases, Metabolism and Ageing, Translational  
11 Research Center for Gastrointestinal Disorders (TARGID), Leuven, Belgium

12 <sup>4</sup> Department of Genetics, Eotvos Lorand University, Budapest, Hungary

13 <sup>5</sup> Institute of Biosciences, São Paulo University (UNESP), Botucatu 18618-689, SP, Brazil

14

15

16

17 \*Corresponding author

18 Email: [tamas.korcsmaros@earlham.ac.uk](mailto:tamas.korcsmaros@earlham.ac.uk)

19

20

## 21 Abstract

22 The SARS-CoV-2 pandemic of 2020 has mobilised scientists around the globe to research all  
23 aspects of the coronavirus virus and its infection. For fruitful and rapid investigation of viral  
24 pathomechanisms, a collaborative and interdisciplinary approach is required. Therefore, we  
25 have developed ViralLink: a systems biology workflow which reconstructs and analyses  
26 networks representing the effect of viruses on intracellular signalling. These networks trace  
27 the flow of signal from intracellular viral proteins through their human binding proteins and  
28 downstream signalling pathways, ending with transcription factors regulating genes  
29 differentially expressed upon viral exposure. In this way, the workflow provides a mechanistic  
30 insight from previously identified knowledge of virally infected cells. By default, the workflow  
31 is set up to analyse the intracellular effects of SARS-CoV-2, requiring only transcriptomics  
32 counts data as input from the user: thus, encouraging and enabling rapid multidisciplinary  
33 research. However, the wide-ranging applicability and modularity of the workflow facilitates  
34 customisation of viral context, *a priori* interactions and analysis methods. Through a case  
35 study of SARS-CoV-2 infected bronchial/tracheal epithelial cells, we evidence the functionality  
36 of the workflow and its ability to identify key pathways and proteins in the cellular response to  
37 infection. The application of ViralLink to different viral infections in a cell-type specific manner  
38 using different available transcriptomics datasets will uncover key mechanisms in viral  
39 pathogenesis. The workflow is available on GitHub  
40 (<https://github.com/korcsmarosgroup/ViralLink>) in an easily accessible Python wrapper script,  
41 or as customisable modular R and Python scripts.

## 42 Author summary

43 Collaborative and multidisciplinary science provides increased value for experimental datasets  
44 and speeds the process of discovery. Such ways of working are especially important at  
45 present due to the urgency of the SARS-CoV-2 pandemic. Here, we present a systems biology  
46 workflow which models the effect of viral proteins on the infected host cell, to aid collaborative  
47 and multidisciplinary research. Through integration of gene expression datasets with context-  
48 specific and context-agnostic molecular interaction datasets, the workflow can be easily  
49 applied to different datasets as they are made available. Application to diverse SARS-CoV-2  
50 datasets will increase our understanding of the mechanistic details of the infection at a cell  
51 type specific level, aid drug target discovery and help explain the variety of clinical  
52 manifestations of the infection.

## 53 Introduction

54 By mid-May 2020 at least 4000 scientific preprints and publications were released relating to  
55 Severe Acute Respiratory Syndrome coronavirus 2 (SARS-CoV-2) and the disease it causes  
56 (COVID-19) (Kwon 2020). This fast uptake in research efforts is vital to decrease the health  
57 and economic impacts of this new pandemic. However, many questions remain unanswered  
58 regarding the molecular processes driving host responses to this coronavirus. One key  
59 challenge to utilisation of new findings is that published datasets are mostly unlinked to each  
60 other (due to parallel efforts by multiple research groups) and not always connected to  
61 community standard resources. An integrated and reusable method to interactively capture  
62 new data and connect it to existing data sources is needed. Such a comprehensive approach  
63 that can be run regularly when relevant new data is available, will increase and update our  
64 understanding of the mechanistic details of the SARS-CoV-2 infection. Further, it will aid drug  
65 target discovery by enabling identification of high confidence mediators through which the  
66 virus is affecting host cells (Barabási et al. 2011). Studying the effect of the virus at molecular  
67 level may explain the variety of clinical manifestations of the infection and the differences in  
68 susceptibility between different populations, and together with soon available human  
69 genomics data, could be used for identifying risk factors.

70

71 Upon entry of a virus into a human cell *via* surface receptors, viral RNA is released and  
72 translated into proteins (Oberfeld et al. 2020). In addition to their role in direct viral replication,  
73 these proteins are able to bind to human proteins creating a host-virus interface (Gordon et  
74 al. 2020). This interaction can lead to downstream signalling changes in the host cell, either  
75 as a result of viral hijacking or through a defined viral immune response by the host cell (Alto  
76 and Orth 2012). Ultimately, this signal flow results in intracellular gene transcription changes,  
77 cell-cell signalling and systemic host responses which drive the tug-of-war between the host  
78 and the virus (Fung et al. 2020). In order to understand and control this conflict, it is necessary  
79 to study each of these levels of host response in detail, including the intracellular response of  
80 the primarily infected cell.

81

82 Currently available data relating to intracellular SARS-CoV-2 infection includes human binding  
83 partners of viral proteins (Gordon et al. 2020) and transcriptomics datasets from infected cell  
84 lines/organoids (Blanco-Melo et al. 2020; Lamers et al. 2020), infected patients (Liao et al.  
85 2020; Huang et al. 2020) and other infected animals (Pfaender et al. 2020; Blanco-Melo et al.  
86 2020). Interdisciplinary and collaborative science can maximise the value of each of these  
87 datasets through data integration and comparison combined with application of different  
88 computational analysis approaches. One such computational analysis method is the utilisation  
89 of network approaches to model molecular interactions between the virus and human proteins

90 as well as within and between human cells (Guyen-Maiorov et al. 2017). Network approaches  
91 have already been applied to study SARS-CoV-2 pathogenesis and to predict drug  
92 repurposing candidates and master regulators based on proteins in proximity to human  
93 binding proteins (which physically associate with SARS-CoV-2 proteins) (Gysi et al. 2020;  
94 Messina et al. 2020; Zhou et al. 2020; Guzzi et al. 2020).

95

96 Here we present a systems biology workflow, to study the effect of viral infections on host  
97 cells. ViralLink reconstructs and analyses a causal molecular interaction network whose signal  
98 starts with the binding of an intracellular viral protein to a human protein, travels via multiple  
99 signalling pathways, and ends at the transcriptional regulation of altered genes. Subsequently,  
100 the workflow investigates the causal network using betweenness centrality measures, cluster  
101 analysis, functional overrepresentation analysis and network visualisation. Using currently  
102 available datasets from SARS-CoV-2 infected bronchial epithelial cells we demonstrate that  
103 this workflow can identify biologically relevant signalling pathways and predict key proteins for  
104 potential drug interventions. As the workflow is built in a modular, standardised and updateable  
105 fashion, it can be used easily in the future to analyse new SARS-CoV-2 related datasets (from  
106 human biopsy data, multiple tissues, etc.).

## 107 Methods

### 108 ViralLink workflow overview

109 The ViralLink workflow investigates the effect of viral infection within cells by generating and  
110 analysing context-specific networks of intracellular signalling and regulatory molecular  
111 interactions. These networks link the intracellular binding of viral and human proteins to the  
112 transcriptional response of the infected cell (Figure 1). The context-specificity of the analysis  
113 is obtained through the choice of input transcriptomics datasets - it could refer to strain of virus,  
114 type of infected cell, severity of infection, age of host or any other context of interest. By  
115 default, the workflow is set up to analyse the intracellular effects of SARS-CoV-2, requiring  
116 only transcriptomics counts data as input and thus encouraging and enabling rapid  
117 multidisciplinary research. However, the wide-ranging applicability and modularity of the  
118 workflow facilitates customisation of viral context, *a priori* interactions and analysis methods.  
119 ViralLink contains three primary stages: 1) collection and input of data; 2) reconstruction of  
120 the network; and 3) investigation of results using functional analysis, clustering, centrality  
121 measures and visualisation.

122

123

## 124 Collection and input of data

125 Reconstruction of causal networks using ViralLink requires four separate input datasets  
126 (Figure 1): viral protein-human binding protein interactions, *a priori* human protein-protein  
127 interactions (PPIs), *a priori* human transcription factor (TF) - target gene (TG) interactions and  
128 an unnormalised counts matrix from a gene expression experiment. By default, all data except  
129 the transcriptomics counts are provided automatically. However alternative input files can be  
130 provided if desired.

131  
132 The default workflow uses SARS-CoV-2 protein-human binding protein interactions obtained  
133 from an affinity-purification mass spectrometry study (Gordon et al. 2020) via Intact  
134 (Hermjakob et al. 2004; Orchard et al. 2014). This data was reformatted to contain one row  
135 per molecular interaction with 2 columns of UniProt IDs: SARS-CoV-2 proteins and human  
136 binding proteins. Alternative viral-human PPIs can be provided using the same data format.  
137 The workflow assumes all viral-human interactions have an inhibiting action on the human  
138 protein, unless a third column named “sign” is present in the input file containing “+” for  
139 activatory and “-” for inhibitory interactions. In addition, data is provided with the workflow  
140 containing the gene names corresponding to each of the SARS-CoV-2 proteins, to enable  
141 easy interpretation of the reconstructed networks.

142  
143 For *a priori* human interactions, the workflow obtains and uses integrated collections of PPI  
144 and TF-TG interactions from OmniPath and DoRothEA, respectively (Türei et al. 2016; Garcia-  
145 Alonso et al. 2019). These interactions are obtained using the ‘OmniPathR’ R package (Türei  
146 et al. 2016; R Core Team 2013) to download and filter signed and directed interactions. For  
147 DoRothEA, only high and medium confidence level interactions are used (confidence scores  
148 A-C). In contrast to importing static input files, this script enables the use of up to date  
149 interaction data. Alternative interaction data can be used with the workflow provided it has the  
150 same format: specifically, it must contain source and target uniprot IDs in the columns ‘to’ and  
151 ‘from’ and if the transcriptomics data uses gene symbols, the interaction data must additionally  
152 contain gene symbols in the columns ‘source\_genesymbol’ and ‘target\_genesymbol’.  
153 Furthermore, the interactions must be directed and signed with the sign of the interaction given  
154 in the column ‘consensus\_stimulation’ where the value ‘1’ represents a stimulation and  
155 anything else represents an inhibition.

156  
157 The aforementioned *a priori* interactions are contextualised using transcriptomics data from  
158 any study of interest which compares viral infected to uninfected human cells or tissues.  
159 Correspondingly, the workflow requires unnormalised counts data from a transcriptomics  
160 experiment (containing Uniprot or gene symbols as IDs) and a corresponding mapping table

161 which lists the sample IDs (from the headers of the counts table) in the 'sample\_name' column  
162 and the 'test' or 'control' status of the sample in the 'condition' column. This mapping table is  
163 used to carry out differential expression of a test condition (e.g. infected) compared to a control  
164 condition (e.g. uninfected). An example expression dataset and mapping table are provided  
165 with the workflow.

166  
167 To process the transcriptomics data, the workflow uses 'DESeq2' in R to normalise the counts  
168 and to carry out differential expression analysis (Love et al. 2014). Any genes passing the log2  
169 fold change and adjusted p value cutoffs, based on the provided parameters (default 1 and  
170 0.05, respectively), are classed as differentially expressed genes (DEGs). Following removal  
171 of all genes with count = 0, normalised log2 counts across all samples are fitted to a gaussian  
172 kernel (Beal 2017). All genes with expression values above mean minus three standard  
173 deviations are considered as expressed genes. Subsequently, context-specific human PPI  
174 and TF-TG interactions are generated by filtering only interactions where both interacting  
175 molecules are expressed.

176  
177 File paths to all input datasets and associated parameters (such as desired log2 fold change  
178 cut off) are specified in the parameters text file which is read in by the workflow.

## 179 Network reconstruction

180 The reconstructed causal network contains three layers of interactions, which are obtained,  
181 by default, from the three *a priori* interaction resources:

- 182 • Viral proteins interacting with human binding partners: from the SARS-CoV-2 collection  
183 in the IntAct database (Hermjakob et al. 2004; Orchard et al. 2014)
- 184 • Intermediary signalling protein interactions: from protein-protein interactions (PPIs) of  
185 the OmniPath collection (Türei et al. 2016)
- 186 • Transcription factors (TFs) regulating differentially expressed genes: from a  
187 transcriptomics dataset of interest and the DoRothEA collection (Garcia-Alonso et al.  
188 2019)

189  
190 A list of all TFs targeting the differentially expressed genes are obtained from the context-  
191 specific TF-TG interactions. The human binding proteins of viral proteins are connected to the  
192 listed TFs through the context-specific human PPIs using a network diffusion approach called  
193 Tied Diffusion Through Interacting Events (TieDIE) (Paull et al. 2013). As inputs for the TieDIE  
194 tool, the following information is used: (1) The signed, directed and expression based filtered  
195 PPIs is used as the input network. (2) Human proteins which are interacting partners of the  
196 viral proteins are used as the start nodes. The number of viral proteins bound to each of the

197 human proteins are assigned as the weights of the start nodes. (3) The TFs of the DEGs in  
198 the dataset are used as the stop nodes. The weights for each of the TFs in the set of stop  
199 nodes were calculated using the following formula (Equation 1) which considers both the log2  
200 fold change of the DEGs as well as the sign (i.e stimulatory or inhibitory) of the relationship  
201 between the TF and the DEG.

202

$$Weight_{TF} = \frac{1}{N_{TF TG}} \sum_{n \in TG} LFC_n \cdot sign(TFTG_n)$$

203

Equation 1

$$sign(x) = \begin{cases} x = +1 & \text{if } x = \text{activatory,} \\ x = -1 & \text{if } x = \text{inhibitory.} \end{cases}$$

204

205

206 After running TieDIE, a custom R script is used to collate all the data into a final viral-initiated  
207 intracellular signalling network (causal network), outputting an edge table representation of  
208 the network, with a node table containing additional node annotations. Starting with the  
209 interactions output from TieDIE, viral protein-human binding protein interactions are added for  
210 each of the present human binding proteins. Similarly, TF-TG interactions (where the TG is a  
211 DEG) are added for each of the present TFs, creating a full network with three interaction  
212 types: SARS-CoV-2 protein-human binding protein, PPI and TF-DEG. All nodes of the network  
213 are added to a node table with annotations including heat values (output from TieDIE), Entrez  
214 IDs (obtained in R using the 'org.Hs.eg.db' package), gene symbols (obtained from UniProt  
215 (UniProt Consortium 2019)) and log2 fold change values from the differential expression  
216 analysis.

## 217 Network investigation

218 Following reconstruction of the causal network, ViralLink provides functionality to investigate  
219 the results using functional analysis, clustering, centrality measures and visualisation.

### 220 Centrality measures

221 To identify key molecules in the reconstructed network ViralLink uses a betweenness centrality  
222 measure - calculating the global importance of a node (in this case a protein) based on the  
223 number of shortest paths which pass through them when connecting all node pairs in the  
224 network (Koschützki and Schreiber 2008). Nodes with high betweenness centrality play a key  
225 role in transduction of signals through the network, and here represent proteins with biological  
226 importance in the cellular response to viral infection. Betweenness centrality is calculated for  
227 each node in the causal network using the R package 'igraph' and output as an annotation in

228 the node table (Csárdi and Nepusz 2006). Alternative centrality measures are available using  
229 the 'igraph' package and can be integrated into the workflow by the user if required.

## 230 Cluster analysis

231 Clustering algorithms are commonly used in network biology to investigate the complex  
232 structure of molecular interaction networks by extracting groups of densely connected  
233 molecules (Bader and Hogue 2003; Brohée et al. 2008). Depending on the number of  
234 molecules included, a cluster can represent a molecular complex or a group of molecules  
235 which function closely with each other. Cluster analysis can identify subsets of a large network  
236 with specific functions and indicate molecules that may have functional redundancy with each  
237 other - potentially having implications for drug targeting. ViralLink employs the MCODE  
238 clustering method to identify groups of densely connected nodes in PPI networks (Bader and  
239 Hogue 2003). To carry out this analysis, ViralLink requires a local version of the Cytoscape  
240 software to be open (Shannon et al. 2003; Su et al. 2014), which is controlled programmatically  
241 using the R package 'RCy3' with the Cytoscape 'MCODE' app (v1.6.1) (Gustavsen et al.  
242 2019). MCODE is run using default parameters: degree cut off =2, haircut=TRUE, node score  
243 cut off=0.2, k-core=2, max depth=100. This analysis outputs the data as node annotations in  
244 the node table, which are used for the functional analysis and visualisation steps of the  
245 workflow. If Cytoscape is not running, this step of the workflow will be skipped.

## 246 Functional analysis

247 To further investigate important cellular functions and signalling pathways directly affected by  
248 the virus of interest, ViralLink carries out functional overrepresentation analysis on different  
249 parts of the causal network:

- 250 1. The DEGs of the network
- 251 2. The upstream human proteins (including human binding proteins, intermediary  
252 signalling proteins and TFs)
- 253 3. Identified clusters (only those with  $\geq 15$  nodes are investigated)

254  
255 Functional overrepresentation analysis is carried out in R using packages 'ClusterProfiler' (for  
256 Gene Ontology annotations (Ashburner et al. 2000)) and 'ReactomePA' (for Reactome  
257 annotations (Yu et al. 2012; Yu and He 2016; Fabregat et al. 2018)). For analysis of the  
258 upstream human signalling proteins and analysis of clusters, all proteins in the context-specific  
259 human PPI interactions are used as the background. For analysis of the DEGs, all target  
260 genes in the context-specific human TF-TG interactions are used as the background. For  
261 Gene Ontology (Biological Process) analysis (except when running the compareCluster



262 command), the 'simplify' command is used (cutoff=0.1, select\_fun=min) to remove redundant  
263 functions. All functions with  $q \text{ val} \leq 0.05$  are considered significantly overrepresented.

264

265 An additional R script is provided alongside the workflow which creates subnetworks of the  
266 causal network based on functions of interest. These function-specific subnetworks highlight  
267 how specific signalling pathways in the infected cell reach (and subsequently affect) specific  
268 functions of the DEGs. For example, the subnetwork could be created to show how viral  
269 proteins can affect different host toll-like receptor pathways, and how these pathways can  
270 ultimately affect DEGs associated with interleukins. In this network the DEG nodes would be  
271 replaced with nodes representing the interleukin functions (which must be overrepresented  
272 based on the functional analysis). This script requires the output files from the functional  
273 analysis, the node and edge tables of the causal network and a file of all Uniprot IDs  
274 associated with all Reactome functions (which is provided with ViralLink, following download  
275 from the Reactome website in April 2020). In addition, the script requires a list of  
276 overrepresented DEG functions (Reactome) and a list of upstream signalling functions  
277 (Reactome) to visualise. The script outputs an edge table, a node table and a Cytoscape file  
278 (if Cytoscape is open locally at the time of running the script).

## 279 Visualisation

280 Data visualisation is often an important part of biological network interpretation, providing new  
281 insights into the data and visually conveying analysis results (Pavlopoulos et al. 2008). As  
282 such, ViralLink has the capability to import reconstructed networks into the open-source  
283 Cytoscape network visualisation software (Shannon et al. 2003; Su et al. 2014). This  
284 functionality requires that the user has Cytoscape installed and open locally. Specifically, the  
285 workflow employs the 'RCy3' R package to interact with Cytoscape programmatically,  
286 importing the node and edge tables to create network visualisations and saving the data as a  
287 '.cys' file. The causal network, the network clusters (where containing  $\geq 15$  nodes) and the  
288 function-specific networks are visualised in this way. If calculated previously, the causal  
289 network nodes are coloured based on their betweenness centrality, however further style and  
290 layout customisation must be carried out by the user directly based on the data.

## 291 Implementation

292 The workflow consists of modular R and Python scripts which can be run separately or through  
293 the provided Python wrapper script. If running for the study of SARS-CoV-2, the only required  
294 input files are related to the transcriptomics data of interest: a raw counts table (using gene  
295 symbols or UniProt protein IDs) and a two-column metadata table specifying test and control  
296 sample IDs. One further script is provided to generate function-specific networks. This script

297 is not included in the wrapper because it requires the user to specify functions of interest from  
298 the output of the functional analysis. To run everything, it is necessary that the user has R,  
299 Python3 and Cytoscape installed. The only file the user needs to edit is the parameters text  
300 file where input file paths and parameters are specified. All scripts, default input files and  
301 details of how to run the scripts are freely accessible on GitHub  
302 (<https://github.com/korcsmarosgroup/ViralLink>).

## 303 Use case

304 To demonstrate the application of this workflow for the study of SARS-CoV-2, we applied it to  
305 a published transcriptomics dataset. We downloaded raw counts tables from a transcriptomics  
306 study of SARS-CoV-2 infected (MOI 2, 24 hour incubation) NHBE cells (Normal Human  
307 Bronchial/tracheal Epithelial cell line) with uninfected controls (Blanco-Melo et al. 2020) via  
308 Gene Expression Omnibus (accession GSE147507) (Edgar et al. 2002; Barrett et al. 2013).  
309 OmniPath and DoRothEA (v2, A-C) were downloaded on 15/04/2020. Any genes with log<sub>2</sub>  
310 fold change  $\geq |0.5|$  and adjusted p value  $\leq 0.05$  were classed as differentially expressed. All  
311 networks were visualised in Cytoscape (v3.7.2).

## 312 Results

### 313 Use case: SARS-CoV-2 infection of lung cells

314 To demonstrate the application of this workflow for the study of SARS-CoV-2, we created  
315 intracellular signalling networks of NHBE cells (from Normal Human Bronchial/tracheal  
316 Epithelial cell lines) upon infection with SARS-CoV-2 based on data published by Blanco Melo  
317 *et al.* (Blanco-Melo et al. 2020) and viral-human binding protein interactions published by  
318 Gordon *et al.* (Gordon et al. 2020). The resulting causal network contains 804 nodes  
319 (molecules) and 5423 interactions (Figure 2A, Supplementary Tables 1-2, Supplementary File  
320 1). The 10 most central proteins of the reconstructed causal network (based on betweenness  
321 centrality) are involved in a wide range of cellular functions (Figure 2B). Taken together these  
322 proteins highlight the propensity for SARS-CoV-2 to affect cell proliferation, apoptosis, cell  
323 adhesion, exocytosis and proinflammatory immune responses. These functions are influenced  
324 through multiple cellular pathways, most notably MAPK/ERK and PI3K/AKT signalling  
325 pathways.

326

327

328

329

330 Functional overrepresentation analysis of the causal network identified an enrichment of  
331 interleukin and interferon related functions among the network DEGs, in line with previously  
332 published findings (Supplementary Figure 1, Supplementary File 2) (Zhang et al. 2020; Chua  
333 et al. 2020; Huang et al. 2020). Overrepresented functions and pathways of the upstream  
334 signalling proteins (human binding proteins, intermediary signalling proteins and TFs) included  
335 innate immunity-related functions, platelet signaling, PI3K/AKT signalling, MAPK activation,  
336 estrogen receptor-mediated signalling, senescence and a number of growth factor receptor-  
337 associated functions (such as VEGF signalling, receptor tyrosine kinases, stem cell growth  
338 factor signalling (SCF-KIT) and neurotrophin receptor signaling). Therefore, we show that this  
339 analysis highlights additional pathways through which SARS-CoV-2 could be affecting the lung  
340 epithelial cells, which cannot be identified by looking at the transcriptomic results in isolation.

341

342 Based on functional overrepresentation analysis, we created a function-specific network by  
343 sub setting the causal network. This visualisation was used to further explore the mechanisms  
344 of how specific signalling pathways are affecting the DEGs (Supplementary Figure 2A,  
345 Supplementary File 3). Specifically, we generated an innate-immunity associated subnetwork  
346 containing all upstream human signalling proteins associated with Reactome functions  
347 cytokine signalling in immune system, signaling by interleukins and MyD88-independent TLR4  
348 cascade and all overrepresented functions of the DEGs (in place of the DEG nodes). These  
349 pathways contain 9/10 of the top betweenness centrality nodes (all except RHOA), evidencing  
350 the centrality and importance of the innate immune response to viral infection. Inspecting the  
351 TF layer of this immune subnetwork, we find a number of key TFs including STAT proteins (3  
352 and 4), IRF proteins (1 and 5) and NFkB-related proteins (NFkB1, NFkBIA).

353

354 Finally, we evidenced the application of MCODE clustering analysis to using the reconstructed  
355 SARS-CoV-2-infected NHBE cell causal network. We identified four clusters containing 15 or  
356 more nodes, making up 19% of the network (154/804) (Supplementary Figure 2B,  
357 Supplementary Table 2, Supplementary File 1). Assuringly, 9/10 of the top betweenness  
358 centrality nodes were included in these four clusters, further confirming the high connectivity  
359 and importance of these nodes in the causal network. Functional overrepresentation analysis  
360 of the cluster nodes highlighted a functional similarity between all four of the clusters  
361 (Supplementary Figure C-D, Supplementary File 2). Likely this is due to the high number of  
362 inter-cluster molecular interactions and because of the functional similarities between the top  
363 central nodes.

364

365 Collectively, we show that our systems biology workflow, Virallink, reconstructs a functionally  
366 relevant intracellular signalling network affected by SARS-CoV-2 infection. Investigation of the

367 networks through functional analysis, centrality measures and cluster analysis, combined with  
368 network visualisations, enables detailed study of the key proteins and pathways involved in  
369 signal transduction.

## 370 Discussion

371 Infection by SARS-CoV-2 can cause a complex and systemic response by the human body.  
372 As such, a better mechanistic understanding of the effects of SARS-CoV-2 will aid  
373 identification of effective drug treatments and help to explain the differences in susceptibilities  
374 across different populations (Kirby 2020). This understanding can be gained using cross-  
375 disciplinary approaches which combine 'omics data generation, computational systems  
376 biology and validatory web lab experiments (Korcsmaros et al. 2017). Here we present a  
377 computational workflow that can be used to model the cellular response to infection by  
378 integrating knowledge of human binding proteins of viral proteins with the transcriptional  
379 response of a cell/cell type. Whilst set up primarily to run analyses based on SARS-CoV-2,  
380 ViralLink can be applied to any viral infection, provided data is available describing possible  
381 interactions between the viral proteins and human proteins.

382  
383 ViralLink builds on our previously published resource MicrobioLink, which reconstructs  
384 networks representing the effect of extracellular and intracellular microbial proteins on cellular  
385 processes (Andrighetti et al. 2020). Differing from MicrobioLink, ViralLink inputs a  
386 predetermined list of viral-host PPIs and focuses only on pathways ending in transcriptional  
387 regulation: thereby reducing the complexity of the workflow (for accessibility and speed  
388 purposes) and increasing its predictive confidence. Furthermore, ViralLink extends the  
389 functionality of MicrobioLink with more advanced network analysis (functional enrichment,  
390 clustering and centrality measures) and visualisation options.

391  
392 By exploiting previously collated and comprehensive collections of molecular interactions  
393 (Türei et al. 2016; Garcia-Alonso et al. 2019), ViralLink predicts how signal flows from the  
394 initial interaction with a viral protein or protein fragment to the ultimate transcriptional changes  
395 induced by the virus. Through mapping the direct intracellular effect of viral infection (using a  
396 network approach), this workflow enables further investigation into specific signalling  
397 pathways and transcription factors which play a key role in signal transduction. Signalling  
398 pathways are primarily regulated through post-translational modifications and thus would not  
399 be identified using transcriptomics datasets (Antebi et al. 2017). In addition, the resulting  
400 intracellular networks allow identification of differentially regulated genes that are affected as  
401 a direct result of viral recognition by protein-protein signalling pathways, rather than by  
402 secondary signals such as elevated cytokine levels. This permits a more focused analysis of  
403 possible drug targets and adds to the understanding of viral pathomechanisms. Functional  
404 analysis and visualisation methods included in the workflow are vital for interpretation of the  
405 generated intracellular networks, enabling detailed investigation of key proteins and signalling  
406 pathways.

407

408 Due to the modularity of the workflow, it can be easily adjusted or extended - different diffusion  
409 and propagation algorithms, such as HotNet2 (Leiserson et al. 2015; Cowen et al. 2017), could  
410 be implemented as required. The implemented diffusion tool, TieDIE, adds mechanistic value  
411 by accounting for local causality (e.g. sign) but, on the other hand, has a reduced possible set  
412 of input *a priori* interactions. If desired, a diffusion tool which does not need signed *a priori*  
413 interactions can be implemented to increase the input dataset size. Alternatively, a different  
414 method, such as an integer linear programming approach which identifies paths based on an  
415 optimisation problem (as implemented in CARNIVAL), could be used for network  
416 reconstruction (Liu et al. 2019). In addition, integration of CARNIVAL could extend the  
417 workflow to permit network reconstruction without supplying upstream perturbations (in this  
418 case the viral-host protein interactions). Whilst not currently integrated due to data availability  
419 issues, the addition of phosphoproteomics data to the pathway propagation methods could  
420 improve the prediction of active pathways (Dugourd et al. 2020) Alternatively, methods to  
421 predict protein activity based on transcriptional signatures, such as VIPER and PROGENy  
422 (Alvarez et al. 2016; Schubert et al. 2018) could be added to the workflow in addition to  
423 network diffusion methods to increase the confidence of pathway predictions. Finally,  
424 extension of the network to include additional regulatory molecule types (e.g. miRNAs) or to  
425 study non-human hosts, could uncover further mechanisms by which SARS-CoV-2 can affect  
426 host cells.

427

428 Accessible through GitHub, the workflow requires R and Python3 to be installed (and  
429 Cytoscape for clustering and visualisation), however only a limited programming ability is  
430 required to run the code. All code is wrapped into a Python script with a separate file where  
431 all input file paths and parameters are specified. At a minimum, only two user specified input  
432 files are required: a raw counts table from a transcriptomics study (using gene symbols or  
433 UniProt protein IDs) and a two-column metadata table specifying test and control sample IDs.  
434 All other files are provided or acquired directly within the workflow - but can be changed by  
435 the user if required. However, one limitation of the current workflow is that creation of  
436 Cytoscape visualisations and clustering analysis require the user to install and open the  
437 Cytoscape app. If this is not possible, for example because the scripts are not being run on a  
438 machine with a graphical interface, these steps are skipped. Furthermore, only basic  
439 visualisation is possible programmatically, due to challenges applying one visualisation  
440 strategy to all possible output networks, especially with regard to the function-based networks.

441

442 In addition to accessibility through a default emphasis on SARS-CoV-2, a key strength of this  
443 workflow is the ability to use different input datasets: including different *a priori* molecular  
444 interactions, viral-human binding protein interactions and expressed/differentially expressed

445 gene lists. This allows extensive customisation and permits rapid implementation to the most  
446 cutting-edge data soon after publication. Running the workflow across different  
447 transcriptomics datasets will allow comparison of intracellular viral responses between  
448 different cell types, different species and across different conditions (such as severe vs  
449 asymptomatic infection). For example, application of the workflow to transcriptomics data from  
450 specific immune cell-types, such as macrophages, will likely uncover different host affected  
451 signalling pathways and key TFs based on the infected cell-type. This, in turn, could increase  
452 our understanding of the role of different immune populations in fighting the infection. In  
453 addition, the workflow can be run on data from other SARS-CoV-2 strains when and if they  
454 emerge, thereby aiding comparisons of mechanisms of action between the strains.

455

456 To evidence the use of this workflow, we applied it to study the effect of SARS-CoV-2 infection  
457 in lung epithelial (NHBE) cells using transcriptomics data published by Blanco-Melo *et al.*  
458 (Blanco-Melo *et al.* 2020). In the resulting causal network, DEGs directly affected by SARS-  
459 CoV-2 initiated signalling are associated with functions that are known responses to SARS-  
460 CoV-2 and other viral infections (Cao 2020; Shi *et al.* 2020; Sallard *et al.* 2020; Arvanitakis *et*  
461 *al.* 1998). Upstream of these affected genes we identified a number of potentially important  
462 signalling pathways relating to classical viral-immune responses, cell survival and cytoskeletal  
463 rearrangements and cell adhesion. Previous investigation of the first SARS coronavirus  
464 (SARS-CoV) identified an inhibition of cell proliferation and an increase in apoptosis regulated  
465 to PI3K/AKT signalling (Mizutani *et al.* 2006; Tsoi *et al.* 2014). Our network of SARS-CoV-2-  
466 initiated intracellular signalling suggests that the PI3K/AKT signalling and the AKT1 protein  
467 itself are key mediators of SARS-CoV-2 initiated signal transduction and that apoptosis and  
468 cell proliferation pathways are affected by SARS-CoV-2, thus highlighting similarities between  
469 the two viruses. However, further experimentation and/or data curation is required to confirm  
470 the direction of change of specific pathways (up- or downregulated) based on the results of  
471 the presented workflow. Together our results indicate that SARS-CoV-2 can affect NHBE cells  
472 through a variety of signalling pathways which have been previously associated with similar  
473 viruses, including growth factor signalling, MAPK/ERK signalling and PI3K/AKT signalling.  
474 Furthermore, centrality measures and cluster analysis identified proteins which likely play a  
475 key role in transduction of these signals, and could be good targets for drug treatments.

476

477 Several other network reconstruction methods exist which could be and have been applied to  
478 study SARS-CoV-2 infections. For example Messina *et al.* and Gysi *et al.* (Messina *et al.* 2020;  
479 Gysi *et al.* 2020) use diffusion algorithms and other similar methods to investigate proteins in  
480 close proximity to human binding proteins based on PPI interactions and gene co-expression  
481 networks. Our workflow builds on these approaches by linking viral proteins to DEGs. Through  
482 this method we can observe which signalling pathways mediate the effect of the virus on

483 cellular transcription levels, creating a systems level view of cellular changes as a result of the  
484 virus. Using the functional analysis methods and network visualisation capabilities of the  
485 workflow, it is possible to predict which viral proteins and host signalling pathways can affect  
486 specific cellular functions, enabling more focused identification of drug targets. In addition to  
487 protein mediators, this method describes TFs which are involved in the cellular response and  
488 identifies which DEGs can be affected as a direct result of viral proteins hijacking host  
489 signalling and which are affected through a different mechanism. In addition to the presented  
490 workflow, at least one other method has been used to reconstruct SARS-CoV-2-initiated  
491 intracellular signalling networks (Ding et al. 2020) corroborating the benefits of such analysis  
492 methods. Differing from the here presented approach, this work uses an extended version of  
493 the Signaling Dynamic Regulatory Events Miner method to reconstruct the networks, resulting  
494 in a more mathematically complex but computationally heavy analysis (Gitter et al. 2013).  
495 Furthermore, the workflow by Ding *et al.* is a less reusable and accessible workflow because  
496 it was designed for a specific analysis.

497

498 In conclusion, ViralLink is an easily accessible, reproducible and scalable systems biology  
499 workflow to reconstruct and analyse molecular interaction networks representing the effect of  
500 the viruses on intracellular signalling. We believe it is the first available integrative workflow  
501 for analysing the downstream effects of viral proteins using viral host interactions and host  
502 response data. Application of this workflow to study COVID-19 based on a wide variety of  
503 conditions and datasets will uncover mechanistic details about SARS-CoV-2 infection of  
504 different cell types, providing valuable predictions for wet-lab and clinical validation.

505

506

## 507 Acknowledgements

508 Many thanks to members of the Saez-Rodriguez group and to the COVID-19 Disease Map  
509 Community for their ideas and support. In particular we thank Julio Saez-Rodriguez, Alberto  
510 Valdeolivas and Aurelien Dugourd for their advice and discussions and Nigel Fosker for help  
511 with the manuscript. This research was supported in part by the NBI Computing infrastructure  
512 for Science (CiS) group through the provision of a High-Performance Computing (HPC)  
513 Cluster.

514



## 515 Funding

516 A.T., L.G., M.O., M.P. and M.M. are supported by the BBSRC Norwich Research Park  
517 Biosciences Doctoral Training Partnership (grant numbers BB/M011216/1 and  
518 BB/S50743X/1). The work of T.K., D.M., and I.H. was supported by the Earlham Institute  
519 (Norwich, UK) in partnership with the Quadram Institute (Norwich, UK) and strategically  
520 supported by the UKRI Biotechnological and Biosciences Research Council (BBSRC) UK  
521 grants (BB/J004529/1, BB/P016774/1, and BB/CSP17270/1). T.K. and D.M. were also funded  
522 by a BBSRC ISP grant for Gut Microbes and Health BB/R012490/1 and its constituent  
523 project(s), BBS/E/F/000PR10353 and BBS/E/F/000PR10355. P.S. was supported by funding  
524 from the European Research Council (ERC) under the European Union's Horizon 2020  
525 research and innovation programme (grant agreement no. 694679).

## 526 Figure and Tables

527 **Figure 1: ViralLink workflow overview.**

528

529 **Figure 2. Causal network of SARS-CoV-2-infected NHBE cells. A)** Signalling flows from  
530 left to right: SARS-CoV-2 proteins/protein fragments (red triangles), human binding proteins  
531 (yellow parallelograms), intermediary signalling proteins (blue circles), transcription factors  
532 (green rectangles) and differentially expressed genes (grey rhombuses). Where a human  
533 protein/gene is acting in multiple layers of the network, it is only visualised once based on the  
534 following priority: DEGs, binding proteins, TFs, signalling proteins. **B)** Results of betweenness  
535 centrality analysis, which measures the global importance of nodes (molecules) in the network.  
536 Nodes coloured based on their betweenness centrality parameter, with the gene names of the  
537 10 highest scoring (most central) nodes overlaid. DEGs have  $\log_2$  fold change  $\geq |0.5|$  and  
538 adjusted p value  $\leq 0.05$ .

539

540

541 **Supplementary Figure 1. Overrepresented Reactome functions (A, B) and Gene**  
542 **Ontology Biological Processes (C, D) of the causal network of SARS-CoV-2 infected**  
543 **NHBE cells. A)** Top 10 overrepresented Reactome functions of upstream signalling proteins  
544 (including human binding proteins, intermediary signalling proteins and TFs) **B)** Top 10  
545 overrepresented Reactome functions of network DEGs C) Top 10 overrepresented GO-BP  
546 functions of upstream signalling proteins (including human binding proteins, intermediary  
547 signalling proteins and TFs) D) All overrepresented GO-BP functions of network DEGs (q  
548 value  $\leq 0.05$ ). DEGs have  $\log_2$  fold change  $\geq |0.5|$  and adjusted p value  $\leq 0.05$ .

549

550 **Supplementary Figure 2: Function-specific network SARS-CoV-2- infected NHBE cells**  
551 **and cluster analysis on SARS-CoV-2-infected NHBE causal network. A)** Function-specific  
552 subnetwork containing upstream signalling proteins related to the top overrepresented (q  
553 value  $\leq 0.05$ ) innate immunity-related Reactome functions (cytokine signalling in immune  
554 system, signaling by interleukins and MyD88-independent TLR4 cascade) and all  
555 overrepresented functions of the DEGs (in place of the DEG nodes). Layers of the network  
556 and node shapes same as in Figure 2. DEGs = differentially expressed genes. DEGs have  
557  $\log_2$  fold change  $\geq |0.5|$  and adjusted p value  $\leq 0.05$ . See Supplementary File 3. B) Cluster  
558 analysis results where clusters have  $\geq 15$  nodes. Position of clustered proteins shown within  
559 the causal network and to the right as isolated clusters. Nodes coloured by their cluster  
560 membership (black=unclustered, green=cluster 1, yellow=cluster 2, pink=cluster 3,  
561 blue=cluster 4). Presence of top 10 betweenness centrality nodes in the clusters is indicated  
562 to the right of the clusters. B) Gene Ontology (GO) overrepresentation analysis of the clusters.

563 Top five GO terms (by adjusted p value) displayed for each cluster. **C)** Reactome  
564 overrepresentation analysis of the clusters. Top five Reactome terms (by adjusted p value)  
565 displayed for each cluster. See Supplementary Table 2 and Supplementary File 2.

566

567 **Supplementary Table 1: Causal network of SARS-CoV-2-infected NHBE cell.**

568

569 **Supplementary Table 2: Node annotations for causal network of SARS-CoV-2-infected**  
570 **NHBE cell.** Includes betweenness centrality measures and clusters identified by MCODE.  
571 MCODE clusters 1,3,4 and 5 correspond to the clusters in the manuscript labelled 1,2,3 and  
572 4 respectively. Clusters 2 and 6 were excluded due to size.

573

574 **Supplementary File 1: Causal network of SARS-CoV-2-infected NHBE cell, Cytoscape**  
575 **file.**

576 **Supplementary File 2: Functional overrepresentation results.** Reactome and Gene  
577 Ontology Biological Processes (q value  $\leq 0.05$ ) for differentially expressed genes (DEGs),  
578 protein-protein (PPI) interaction nodes (human binding proteins, signalling proteins and  
579 transcription factors) and the clusters of the causal network of SARS-CoV-2-infected NHBE  
580 cell.

581 **Supplementary File 3: Function-specific network of SARS-CoV-2- infected NHBE cells,**  
582 **Cytoscape file.**

## 583 References

- 584 Alto, N.M. and Orth, K. 2012. Subversion of cell signaling by pathogens. *Cold Spring Harbor*  
585 *Perspectives in Biology* 4(9), p. a006114.
- 586 Alvarez, M.J., Shen, Y., Giorgi, F.M., et al. 2016. Functional characterization of somatic  
587 mutations in cancer using network-based inference of protein activity. *Nature Genetics* 48(8),  
588 pp. 838–847.
- 589 Andrichetti, T., Bohar, B., Lemke, N., Sudhakar, P. and Korcsmaros, T. 2020. MicrobioLink:  
590 An Integrated Computational Pipeline to Infer Functional Effects of Microbiome-Host  
591 Interactions. *Cells* 9(5).
- 592 Antebi, Y.E., Nandagopal, N. and Elowitz, M.B. 2017. An operational view of intercellular  
593 signaling pathways. *Current Opinion in Systems Biology* 1, pp. 16–24.
- 594 Arvanitakis, L., Geras-Raaka, E. and Gershengorn, M.C. 1998. Constitutively signaling G-  
595 protein-coupled receptors and human disease. *Trends in Endocrinology and Metabolism*  
596 9(1), pp. 27–31.
- 597 Ashburner, M., Ball, C.A., Blake, J.A., et al. 2000. Gene Ontology: tool for the unification of  
598 biology. *Nature Genetics* 25(1), pp. 25–29.
- 599 Bader, G.D. and Hogue, C.W.V. 2003. An automated method for finding molecular  
600 complexes in large protein interaction networks. *BMC Bioinformatics* 4, p. 2.
- 601 Barabási, A.-L., Gulbahce, N. and Loscalzo, J. 2011. Network medicine: a network-based  
602 approach to human disease. *Nature Reviews. Genetics* 12(1), pp. 56–68.
- 603 Barrett, T., Wilhite, S.E., Ledoux, P., et al. 2013. NCBI GEO: archive for functional genomics  
604 data sets--update. *Nucleic Acids Research* 41(Database issue), pp. D991-5.
- 605 Beal, J. 2017. Biochemical complexity drives log-normal variation in genetic expression.  
606 *Engineering Biology* 1(1), pp. 55–60.
- 607 Blanco-Melo, D., Nilsson-Payant, B.E., Liu, W.-C., et al. 2020. Imbalanced Host Response to  
608 SARS-CoV-2 Drives Development of COVID-19. *Cell* 181(5), pp. 1036-1045.e9.
- 609 Brohée, S., Faust, K., Lima-Mendez, G., Vanderstocken, G. and van Helden, J. 2008.  
610 Network Analysis Tools: from biological networks to clusters and pathways. *Nature Protocols*  
611 3(10), pp. 1616–1629.
- 612 Cao, X. 2020. COVID-19: immunopathology and its implications for therapy. *Nature*  
613 *Reviews. Immunology* 20(5), pp. 269–270.
- 614 Chua, R.L., Lukassen, S., Trump, S., et al. 2020. Cross-talk between the airway epithelium  
615 and activated immune cells defines severity in COVID-19. *medRxiv*.

- 616 Cowen, L., Ideker, T., Raphael, B.J. and Sharan, R. 2017. Network propagation: a universal  
617 amplifier of genetic associations. *Nature Reviews. Genetics* 18(9), pp. 551–562.
- 618 Csárdi, G. and Nepusz, T. 2006. The igraph software package for complex network  
619 research. *undefined*.
- 620 Ding, J., Lugo-Martinez, J., Yuan, Y., Kotton, D.N. and Bar-Joseph, Z. 2020. Reconstructing  
621 SARS-CoV-2 response signaling and regulatory networks. *BioRxiv*.
- 622 Dugourd, A., Kuppe, C., Sciacovelli, M., et al. 2020. Causal integration of multi-omics data  
623 with prior knowledge to generate mechanistic hypotheses. *BioRxiv*.
- 624 Edgar, R., Domrachev, M. and Lash, A.E. 2002. Gene Expression Omnibus: NCBI gene  
625 expression and hybridization array data repository. *Nucleic Acids Research* 30(1), pp. 207–  
626 210.
- 627 Fabregat, A., Jupe, S., Matthews, L., et al. 2018. The Reactome Pathway Knowledgebase.  
628 *Nucleic Acids Research* 46(D1), pp. D649–D655.
- 629 Fung, S.-Y., Yuen, K.-S., Ye, Z.-W., Chan, C.-P. and Jin, D.-Y. 2020. A tug-of-war between  
630 severe acute respiratory syndrome coronavirus 2 and host antiviral defence: lessons from  
631 other pathogenic viruses. *Emerging microbes & infections* 9(1), pp. 558–570.
- 632 Garcia-Alonso, L., Holland, C.H., Ibrahim, M.M., Turei, D. and Saez-Rodriguez, J. 2019.  
633 Benchmark and integration of resources for the estimation of human transcription factor  
634 activities. *Genome Research* 29(8), pp. 1363–1375.
- 635 Gitter, A., Carmi, M., Barkai, N. and Bar-Joseph, Z. 2013. Linking the signaling cascades  
636 and dynamic regulatory networks controlling stress responses. *Genome Research* 23(2), pp.  
637 365–376.
- 638 Gordon, D.E., Jang, G.M., Bouhaddou, M., et al. 2020. A SARS-CoV-2 protein interaction  
639 map reveals targets for drug repurposing. *Nature*.
- 640 Gustavsen, J.A., Pai, S., Isserlin, R., Demchak, B. and Pico, A.R. 2019. RCy3: Network  
641 biology using Cytoscape from within R. [version 3; peer review: 3 approved].  
642 *F1000Research* 8, p. 1774.
- 643 Guven-Maiorov, E., Tsai, C.-J. and Nussinov, R. 2017. Structural host-microbiota interaction  
644 networks. *PLoS Computational Biology* 13(10), p. e1005579.
- 645 Guzzi, P.H., Mercatelli, D., Ceraolo, C. and Giorgi, F.M. 2020. Master Regulator Analysis of  
646 the SARS-CoV-2/Human Interactome. *Journal of clinical medicine* 9(4).
- 647 Gysi, D.M., Valle, Í.D., Zitnik, M., et al. 2020. Network Medicine Framework for Identifying  
648 Drug Repurposing Opportunities for COVID-19. *arXiv*.
- 649 Hermjakob, H., Montecchi-Palazzi, L., Lewington, C., et al. 2004. IntAct: an open source

- 650 molecular interaction database. *Nucleic Acids Research* 32(Database issue), pp. D452-5.
- 651 Huang, L., Shi, Y., Gong, B., et al. 2020. Blood single cell immune profiling reveals the  
652 interferon-MAPK pathway mediated adaptive immune response for COVID-19. *medRxiv*.
- 653 Kirby, T. 2020. Evidence mounts on the disproportionate effect of COVID-19 on ethnic  
654 minorities. *The Lancet. Respiratory medicine*.
- 655 Korcsmaros, T., Schneider, M.V. and Superti-Furga, G. 2017. Next generation of network  
656 medicine: interdisciplinary signaling approaches. *Integrative Biology: Quantitative*  
657 *Biosciences from Nano to Macro* 9(2), pp. 97–108.
- 658 Koschützki, D. and Schreiber, F. 2008. Centrality analysis methods for biological networks  
659 and their application to gene regulatory networks. *Gene regulation and systems biology : 2*,  
660 pp. 193–201.
- 661 Kwon, D. 2020. How swamped preprint servers are blocking bad coronavirus research.  
662 *Nature* 581(7807), pp. 130–131.
- 663 Lamers, M.M., Beumer, J., van der Vaart, J., et al. 2020. SARS-CoV-2 productively infects  
664 human gut enterocytes. *Science*.
- 665 Leiserson, M.D.M., Vandin, F., Wu, H.-T., et al. 2015. Pan-cancer network analysis identifies  
666 combinations of rare somatic mutations across pathways and protein complexes. *Nature*  
667 *Genetics* 47(2), pp. 106–114.
- 668 Liao, M., Liu, Y., Yuan, J., et al. 2020. The landscape of lung bronchoalveolar immune cells  
669 in COVID-19 revealed by single-cell RNA sequencing. *medRxiv*.
- 670 Liu, A., Trairatphisan, P., Gjerga, E., Didangelos, A., Barratt, J. and Saez-Rodriguez, J.  
671 2019. From expression footprints to causal pathways: contextualizing large signaling  
672 networks with CARNIVAL. *NPJ Systems Biology and Applications* 5, p. 40.
- 673 Love, M.I., Huber, W. and Anders, S. 2014. Moderated estimation of fold change and  
674 dispersion for RNA-seq data with DESeq2. *Genome Biology* 15(12), pp. 550–550.
- 675 Messina, F., Giombini, E., Agrati, C., et al. 2020. COVID-19: Viral-host interactome analyzed  
676 by network based-approach model to study pathogenesis of SARS-CoV-2 infection. *BioRxiv*.
- 677 Mizutani, T., Fukushi, S., Iizuka, D., et al. 2006. Inhibition of cell proliferation by SARS-CoV  
678 infection in Vero E6 cells. *FEMS Immunology and Medical Microbiology* 46(2), pp. 236–243.
- 679 Oberfeld, B., Achanta, A., Carpenter, K., et al. 2020. SnapShot: COVID-19. *Cell* 181(4), pp.  
680 954-954.e1.
- 681 Orchard, S., Ammari, M., Aranda, B., et al. 2014. The MIntAct project - IntAct as a common  
682 curation platform for 11 molecular interaction databases. *Nucleic Acids Research*  
683 42(Database issue), pp. D358-63.

- 684 Paull, E.O., Carlin, D.E., Niepel, M., Sorger, P.K., Haussler, D. and Stuart, J.M. 2013.  
685 Discovering causal pathways linking genomic events to transcriptional states using Tied  
686 Diffusion Through Interacting Events (TieDIE). *Bioinformatics* 29(21), pp. 2757–2764.
- 687 Pavlopoulos, G.A., Wegener, A.-L. and Schneider, R. 2008. A survey of visualization tools  
688 for biological network analysis. *BioData mining* 1, p. 12.
- 689 Pfaender, S., Mar, K.B., Michailidis, E., et al. 2020. LY6E impairs coronavirus fusion and  
690 confers immune control of viral disease. *BioRxiv*.
- 691 R Core Team 2013. *R: A language and environment for statistical computing*. Vienna,  
692 Austria: R Foundation for Statistical Computing.
- 693 Sallard, E., Lescure, F.-X., Yazdanpanah, Y., Mentre, F. and Peiffer-Smadja, N. 2020. Type  
694 1 interferons as a potential treatment against COVID-19. *Antiviral Research* 178, p. 104791.
- 695 Schubert, M., Klinger, B., Klünemann, M., et al. 2018. Perturbation-response genes reveal  
696 signaling footprints in cancer gene expression. *Nature Communications* 9(1), p. 20.
- 697 Shannon, P., Markiel, A., Ozier, O., et al. 2003. Cytoscape: a software environment for  
698 integrated models of biomolecular interaction networks. *Genome Research* 13(11), pp.  
699 2498–2504.
- 700 Shi, Y., Tan, M., Chen, X., et al. 2020. Immunopathological characteristics of coronavirus  
701 disease 2019 cases in Guangzhou, China. *medRxiv*.
- 702 Su, G., Morris, J.H., Demchak, B. and Bader, G.D. 2014. Biological network exploration with  
703 Cytoscape 3. *Current Protocols in Bioinformatics* 47, pp. 8.13.1-24.
- 704 Tsoi, H., Li, L., Chen, Z.S., Lau, K.-F., Tsui, S.K.W. and Chan, H.Y.E. 2014. The SARS-  
705 coronavirus membrane protein induces apoptosis via interfering with PDK1-PKB/Akt  
706 signalling. *The Biochemical Journal* 464(3), pp. 439–447.
- 707 Türei, D., Korcsmáros, T. and Saez-Rodriguez, J. 2016. OmniPath: guidelines and gateway  
708 for literature-curated signaling pathway resources. *Nature Methods* 13(12), pp. 966–967.
- 709 UniProt Consortium 2019. UniProt: a worldwide hub of protein knowledge. *Nucleic Acids*  
710 *Research* 47(D1), pp. D506–D515.
- 711 Yu, G. and He, Q.-Y. 2016. ReactomePA: an R/Bioconductor package for reactome pathway  
712 analysis and visualization. *Molecular Biosystems* 12(2), pp. 477–479.
- 713 Yu, G., Wang, L.-G., Han, Y. and He, Q.-Y. 2012. clusterProfiler: an R package for  
714 comparing biological themes among gene clusters. *Omics: a journal of integrative biology*  
715 16(5), pp. 284–287.
- 716 Zhang, H., Ai, J.-W., Yang, W., et al. 2020. Metatranscriptomic Characterization of COVID-  
717 19 Identified A Host Transcriptional Classifier Associated With Immune Signaling. *Clinical*

718 *Infectious Diseases.*

719 Zhou, Y., Hou, Y., Shen, J., Huang, Y., Martin, W. and Cheng, F. 2020. Network-based drug

720 repurposing for novel coronavirus 2019-nCoV/SARS-CoV-2. *Cell discovery* 6, p. 14.



Figure 1

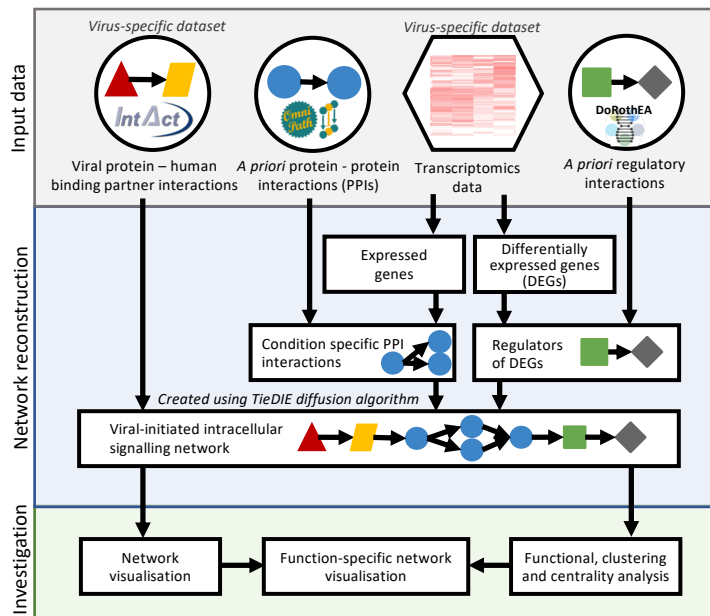

Figure 2

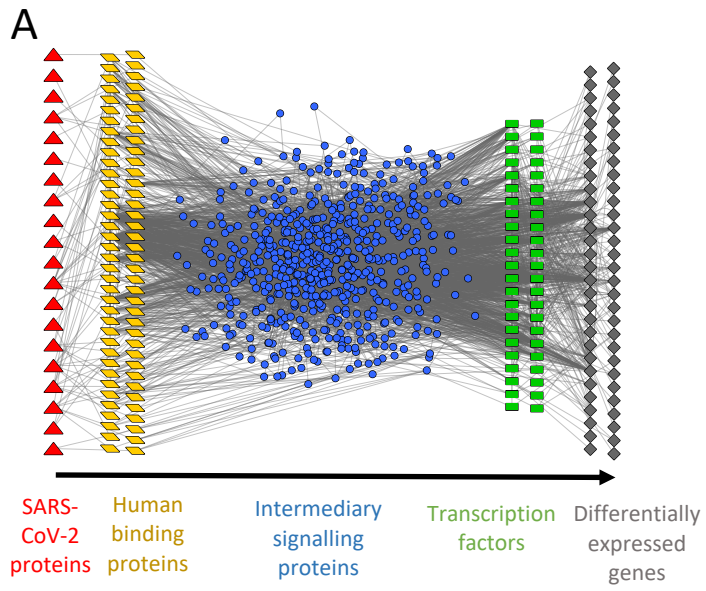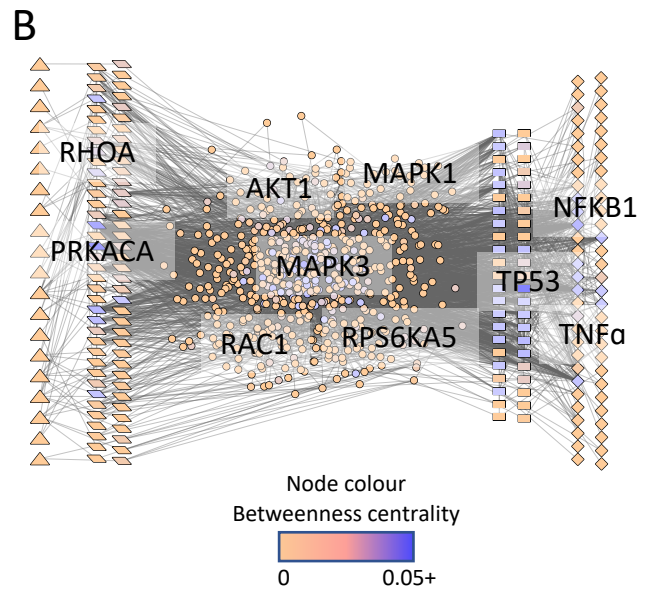

# Supplementary figure 1

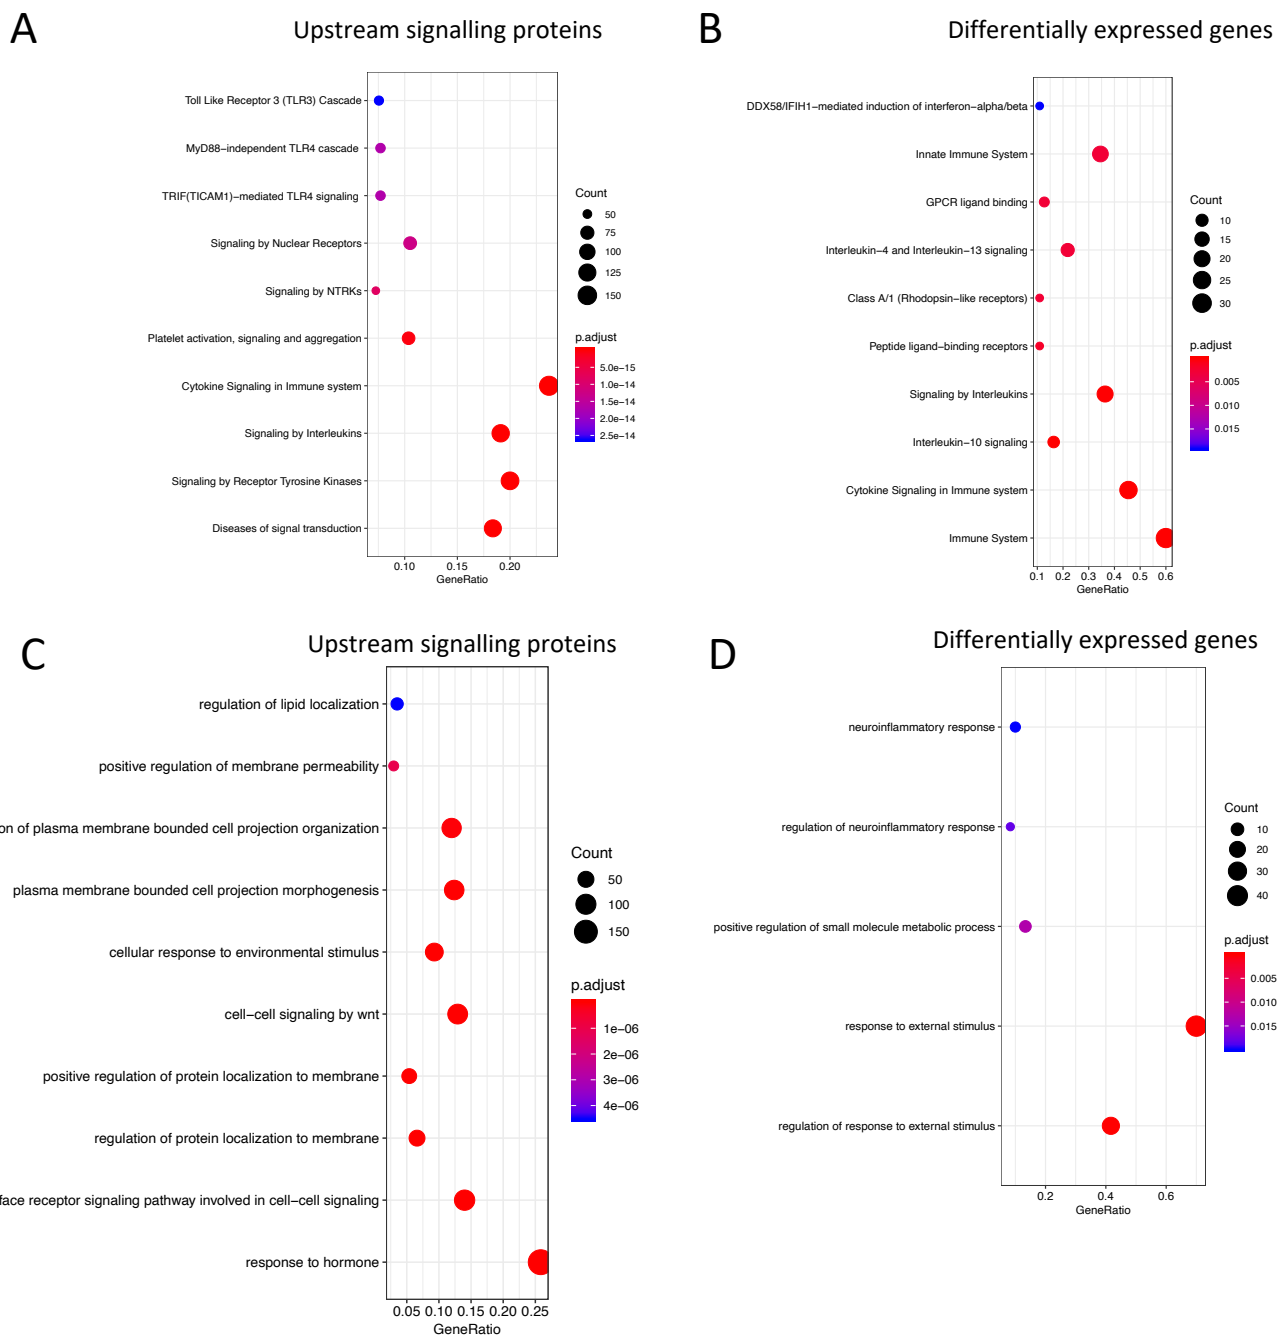

# Supplementary figure 2

A

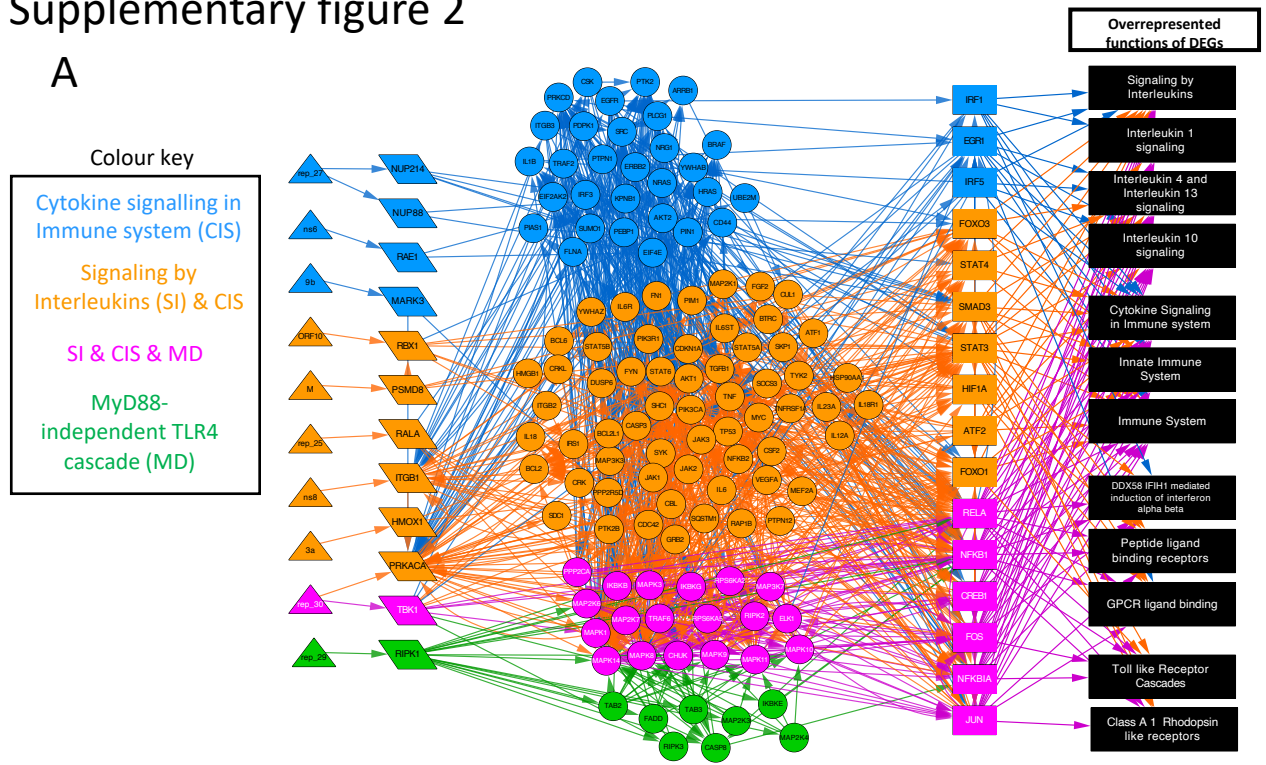

B

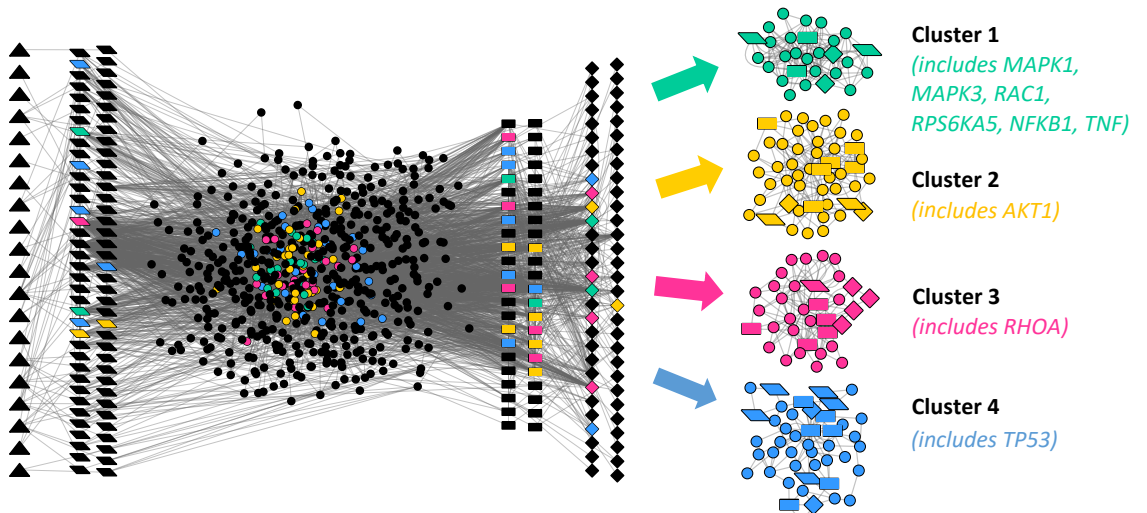

C

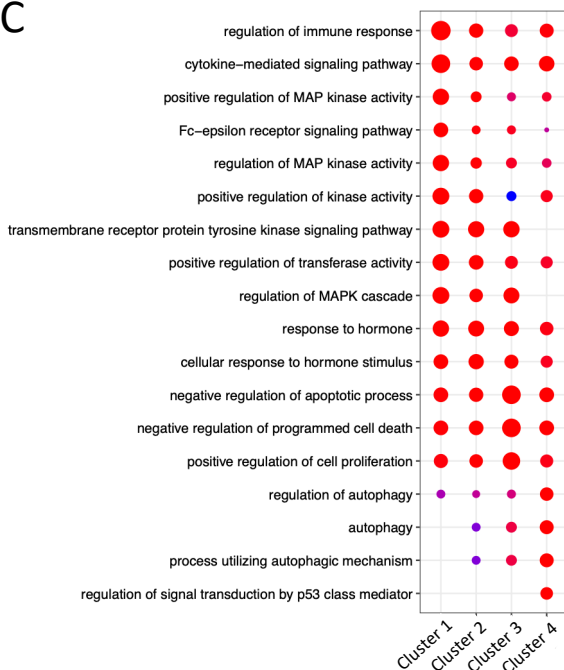

D

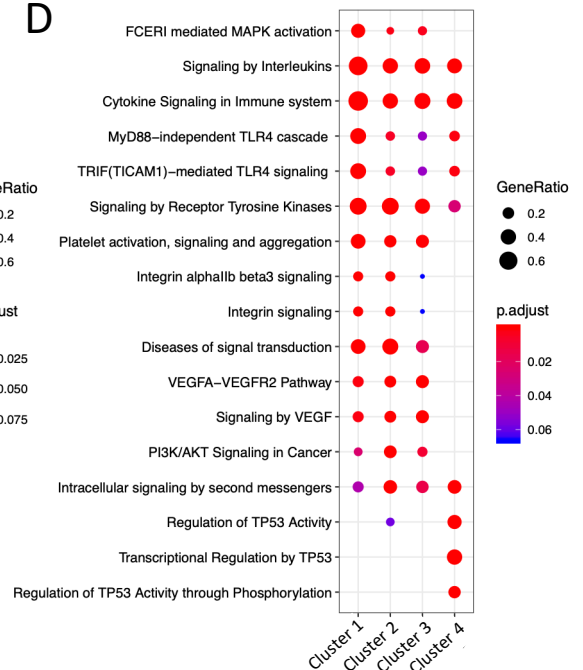

Source: https://www.biorxiv.org/content/biorxiv/early/2020/06/23/2020.06.23.167254.full.pdf
